# Supplementary material
Source: bioRxiv or medRxiv preprint supplement (https://medrxiv.org/highwire/filestream/85857/field_highwire_adjunct_files/0/2020.06.11.20129007-1.pdf)
Supplement: Supplementary file [file 2020.06.11.20129007-1.pdf]

## SUPPORTING INFORMATION

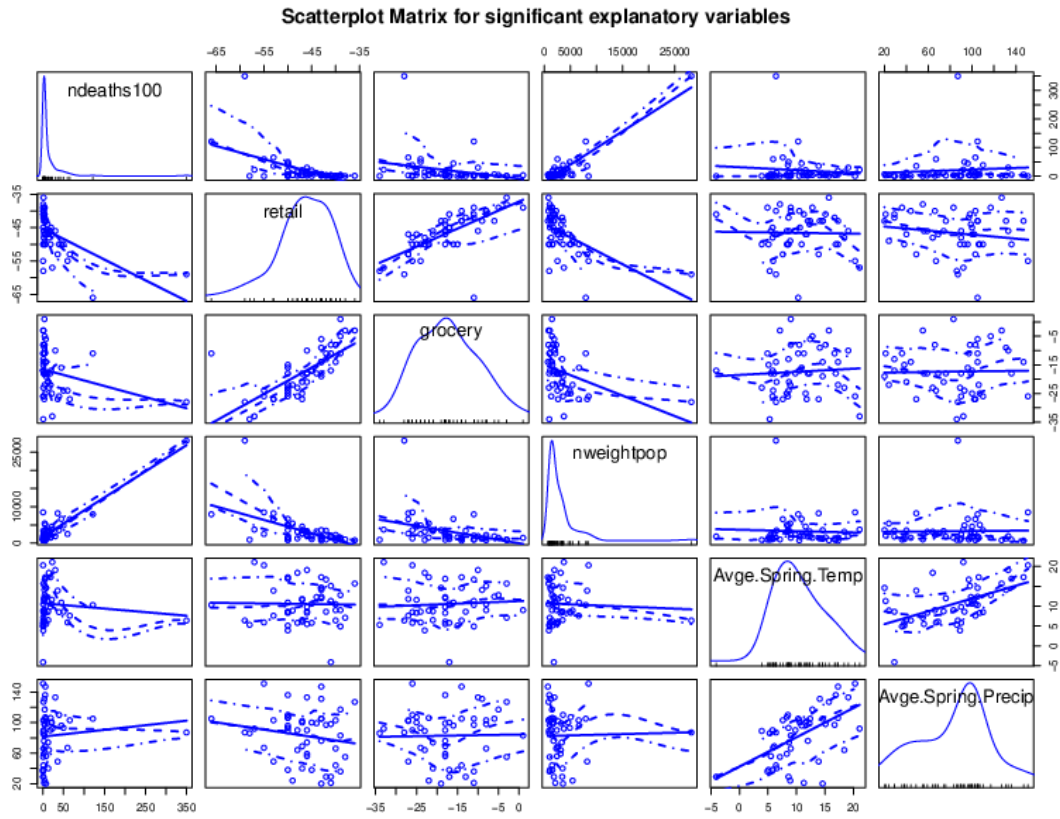

Fig. S1. **Scatterplot matrix of five significant explanatory variables for the number of deaths per 100,000 in each state.** Panels show: Number of deaths per 100,000, retail mobility index, grocery mobility index, PWD, average spring temperature, and average spring precipitation. Data are shown by the circles, regression lines are solid, smoothed mean values are shown by the dashed line, and variances are shown by the dashed-dotted lines.

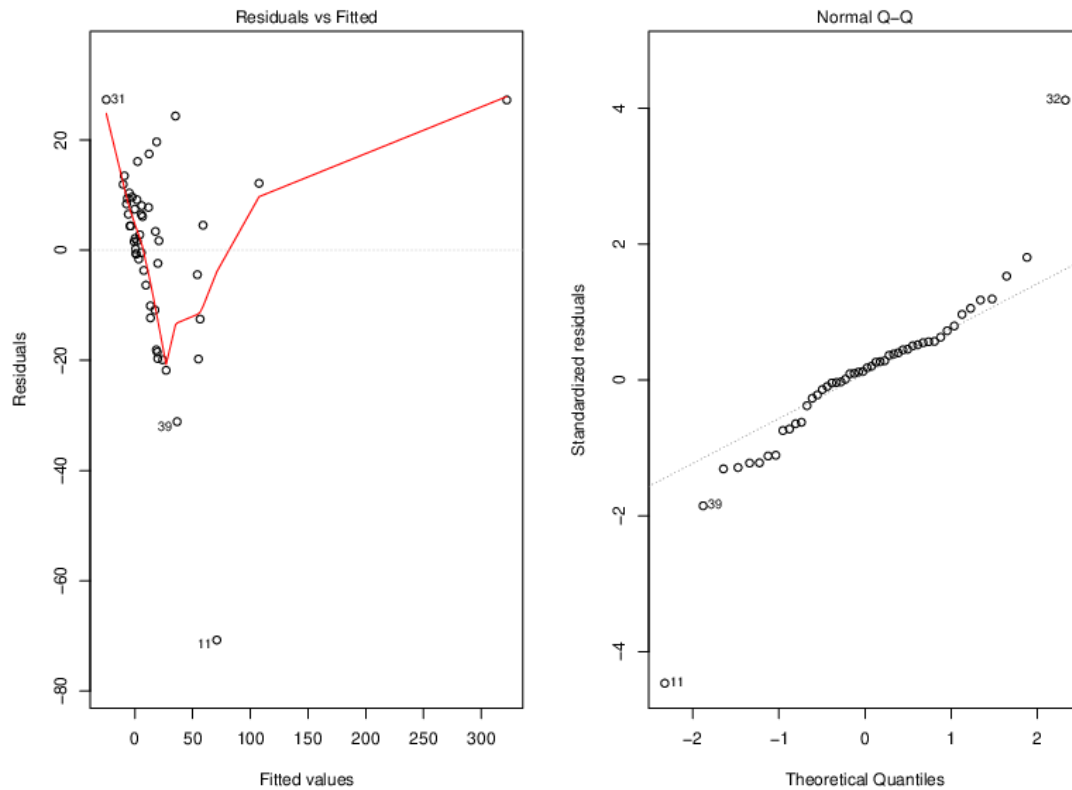

Fig. S2. (Left) **Residuals versus fitted values.** (Right) **Q-Q plot of standardized residuals.** Used as a diagnostic, the residuals versus fitted plot should be approximately random, while the Q-Q plot (a normal probability plot) should be approximately straight if the errors are distributed normally.

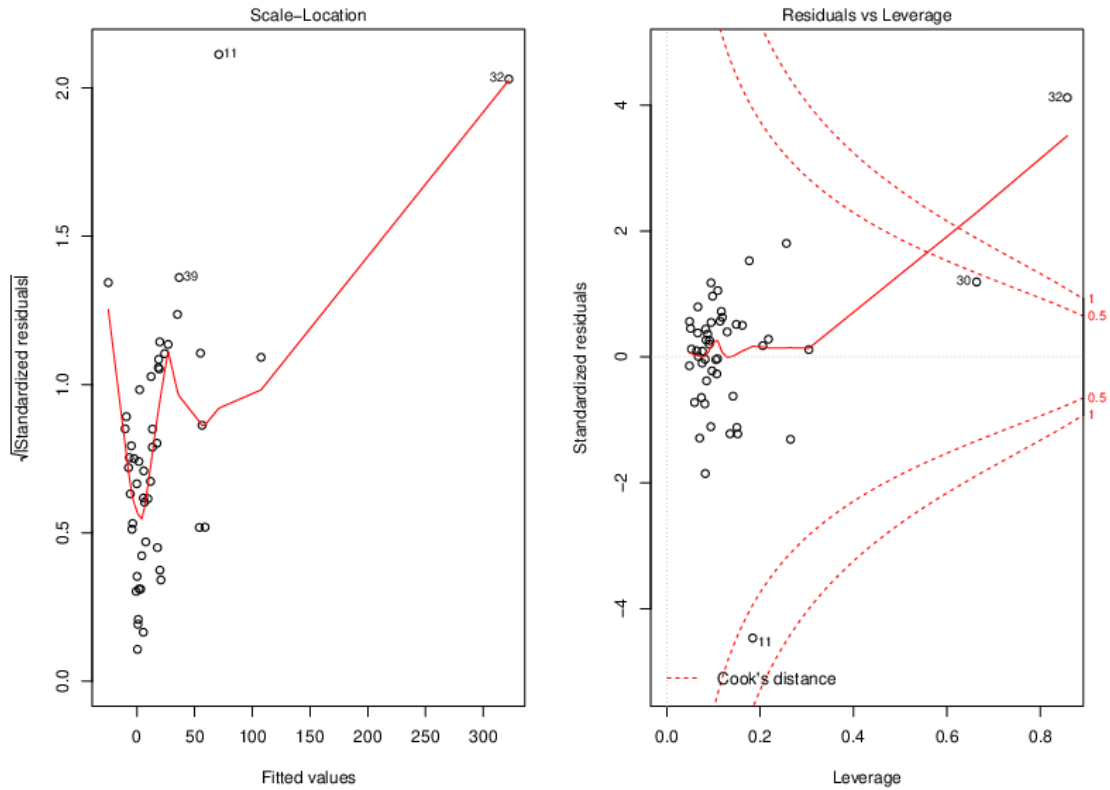

Fig. S3. **(Left) Scale-location. (Right) Residuals versus leverage.** As a diagnostic, the points in the scale-location plot should be distributed randomly, while the last residuals versus leverage suggests which point have the greatest influence on the model. See text for more details on interpretation.

Table S1. Summary of multiple-regression analysis on 28 explanatory variables described in Table 1.

|                           | <i>Dependent variable:</i> |
|---------------------------|----------------------------|
|                           | ndeaths100                 |
| retail                    | −2.545***<br>(0.870)       |
| grocery                   | 0.842<br>(0.579)           |
| parks                     | 0.085<br>(0.097)           |
| transit                   | 0.665<br>(0.587)           |
| workplaces                | −0.505<br>(0.930)          |
| residential               | −1.852<br>(4.689)          |
| age                       | −2.736<br>(4.279)          |
| low.indust.toxins         | −0.146<br>(0.310)          |
| low.pollution.health.risk | 0.056<br>(0.262)           |
| Chron.Low.Resp.Death.Rate | 0.639<br>(0.545)           |
| age.65.years.and.over     | 2.218<br>(4.373)           |
| Race.param.1              | 1.405<br>(1.181)           |
| Race.param.2              | 0.286<br>(1.538)           |
| Race.param.3              | 0.292<br>(0.553)           |
| Race.param.4              | 0.641<br>(1.011)           |
| Obesity.Rates             | 0.137<br>(1.373)           |
| Average.Relative.Humidity | −0.413<br>(0.435)          |

Table S2. Summary of the five most significant explanatory variables for predicting the number of deaths per 100,000 in each state.

|                         | <i>Dependent variable:</i>  |
|-------------------------|-----------------------------|
|                         | ndeaths100                  |
| retail                  | -1.625**<br>(0.750)         |
| grocery                 | 1.382***<br>(0.507)         |
| PWD                     | 0.011***<br>(0.001)         |
| Avge.Spring.Temp        | -1.438**<br>(0.683)         |
| Avge.Spring.Precip      | 0.172*<br>(0.102)           |
| Constant                | -67.055**<br>(27.940)       |
| Observations            | 50                          |
| R <sup>2</sup>          | 0.875                       |
| Adjusted R <sup>2</sup> | 0.861                       |
| Residual Std. Error     | 19.544 (df = 44)            |
| F Statistic             | 61.753*** (df = 5; 44)      |
| <i>Note:</i>            | *p<0.1; **p<0.05; ***p<0.01 |

Table S3. step-wise regression using the MASS package.

|                                 | <i>Dependent variable:</i>  |
|---------------------------------|-----------------------------|
|                                 | ndeaths100                  |
| retail                          | −2.389***<br>(0.502)        |
| grocery                         | 0.814**<br>(0.348)          |
| parks                           | 0.107<br>(0.065)            |
| transit                         | 0.765**<br>(0.306)          |
| Chron.Low.Resp.Death.Rate       | 0.570**<br>(0.272)          |
| Race.param.1                    | 0.986***<br>(0.284)         |
| Race.param.4                    | 0.460*<br>(0.228)           |
| Average.Relative.Humidity       | −0.505**<br>(0.222)         |
| Average.Annual.Temperature..C.  | −2.110***<br>(0.670)        |
| Average.Annual.Precipitation.mm | 0.096***<br>(0.022)         |
| State.of.emergency.declared     | 0.828<br>(0.504)            |
| Avge.Spring.Precip              | −0.901***<br>(0.232)        |
| UV.Index                        | 2.208**<br>(0.977)          |
| PWD                             | 0.012***<br>(0.001)         |
| dateDeath1                      | −0.692**<br>(0.318)         |
| Constant                        | 12,564.970**<br>(5,852.469) |
| Observations                    | 50                          |
| R <sup>2</sup>                  | 0.271                       |

Table S4. Random Forest Method for relative importance of parameters.

| Parameter                       | Overall     |
|---------------------------------|-------------|
| retail                          | 6.70932241  |
| grocery                         | 1.65334776  |
| parks                           | 0.40933968  |
| transit                         | -1.05140388 |
| workplaces                      | -1.63133731 |
| residential                     | 3.44869838  |
| age                             | 0.44395140  |
| low.indust.toxins               | 0.94348756  |
| low.pollution.health.risk       | -1.89831370 |
| Chron.Low.Resp.Death.Rate       | 5.42687854  |
| age.65.years.and.over           | -1.76708823 |
| Race.param.1                    | 1.61188454  |
| Race.param.2                    | 1.29263755  |
| Race.param.3                    | 2.82938257  |
| Race.param.4                    | 0.98131658  |
| Obesity.Rates                   | 2.08230701  |
| Average.Relative.Humidity       | -0.59747647 |
| Average.Dew.Point               | 1.72889125  |
| Average.Annual.Temperature..C.  | 0.06729476  |
| Average.Annual.Precipitation.mm | 1.02933029  |
| State.of.emergency.declared     | -0.79372186 |
| Avge.Spring.Temp                | 2.06492880  |
| Avge.Spring.Precip              | -1.01229332 |
| relative.humidity.morning       | -0.80503322 |
| relative.humidity.afternoon     | 3.06231970  |
| UV.Index                        | 0.68373784  |
| PWD                             | 7.16775890  |
| dateDeath1                      | 1.48484773  |



Table S5. Xgboost Method for relative importance of parameters. Top-20 shown.

| Parameter                       | Overall   |
|---------------------------------|-----------|
| retail                          | 100.00000 |
| PWD                             | 31.50172  |
| workplaces                      | 11.96575  |
| grocery                         | 9.92375   |
| Race.param.1                    | 3.09216   |
| relative.humidity.afternoon     | 2.92808   |
| dateDeath1                      | 2.57557   |
| Avge.Spring.Temp                | 1.85285   |
| Average.Dew.Point               | 1.39623   |
| Chron.Low.Resp.Death.Rate       | 1.18016   |
| parks                           | 0.72053   |
| low.pollution.health.risk       | 0.47567   |
| UV.Index                        | 0.38364   |
| Average.Annual.Precipitation.mm | 0.23422   |
| transit                         | 0.22316   |
| age.65.years.and.over           | 0.14004   |
| relative.humidity.morning       | 0.13864   |
| Race.param.4                    | 0.13657   |
| Race.param.2                    | 0.10647   |
| low.indust.toxins               | 0.08646   |

Table S6. MARS Method for relative importance of parameters.

| Parameter                       | nsubsets | gcv   | rss   |
|---------------------------------|----------|-------|-------|
| PWD                             | 6        | 100.0 | 100.0 |
| Race.param.2                    | 5        | 29.0  | 31.3  |
| retail                          | 4        | 20.4  | 22.8  |
| grocery                         | 3        | 10.9  | 14.8  |
| Average.Annual.Precipitation.mm | 1        | 4.5   | 7.4   |

Table S7. Step-wise Regression Method for relative importance of parameters.

| Parameter          | Df | Sum of Sq | RSS    | AIC    |
|--------------------|----|-----------|--------|--------|
| none               |    | 16807     | 302.88 |        |
| Avge.Spring.Precip | 1  | 1088      | 17895  | 304.01 |
| Avge.Spring.Temp   | 1  | 1694      | 18501  | 305.68 |
| retail             | 1  | 1795      | 18603  | 305.95 |
| grocery            | 1  | 2842      | 19649  | 308.69 |
| PWD                | 1  | 72961     | 89768  | 384.65 |

Table S8. Step-wise Regression Method for relative importance of parameters.

| No. | variable                        | mean dropout loss | label        |
|-----|---------------------------------|-------------------|--------------|
| 1   | full model                      | 614479.0          | randomForest |
| 2   | State                           | 614479.0          | randomForest |
| 3   | ndeaths100                      | 614479.0          | randomForest |
| 4   | relative.humidity.morning       | 617600.1          | randomForest |
| 5   | low.indust.toxins               | 618002.4          | randomForest |
| 6   | Obesity.Rates                   | 618421.8          | randomForest |
| 7   | Average.Annual.Precipitation.mm | 619321.7          | randomForest |
| 8   | UV.Index                        | 620157.1          | randomForest |
| 9   | age.65.years.and.over           | 620374.4          | randomForest |
| 10  | age                             | 622894.6          | randomForest |
| 11  | low.pollution.health.risk       | 623242.5          | randomForest |
| 12  | Avge.Spring.Precip              | 623606.0          | randomForest |
| 13  | State.of.emergency.declared     | 625839.0          | randomForest |
| 14  | Race.param.3                    | 626778.1          | randomForest |
| 15  | parks                           | 628155.8          | randomForest |
| 16  | Race.param.4                    | 629312.3          | randomForest |
| 17  | Avge.Spring.Temp                | 629676.5          | randomForest |
| 18  | Average.Annual.Temperature..C.  | 633470.7          | randomForest |
| 19  | Average.Dew.Point               | 637143.8          | randomForest |
| 20  | dateDeath1                      | 639675.7          | randomForest |
| 21  | relative.humidity.afternoon     | 640153.5          | randomForest |
| 22  | transit                         | 643169.1          | randomForest |
| 23  | Race.param.2                    | 646339.4          | randomForest |
| 24  | residential                     | 649959.4          | randomForest |
| 25  | Race.param.1                    | 654734.9          | randomForest |
| 26  | grocery                         | 669505.6          | randomForest |
| 27  | Average.Relative.Humidity       | 742232.9          | randomForest |
| 28  | Chron.Low.Resp.Death.Rate       | 773875.2          | randomForest |
| 29  | workplaces                      | 778847.0          | randomForest |
| 30  | retail                          | 948946.8          | randomForest |
| 31  | PWD                             | 1084427.7         | randomForest |
| 32  | baseline                        | 3952434.6         | randomForest |
